# Supplementary material for: Assessing concordance among human, in silico predictions and functional assays on genetic variant classification
Source: Oxford University Press journal article supplement (doi:10.1093/bioinformatics/btz442), 2019-05-23
Supplement: bioinformatics_35_24_5163_s5.doc [file bioinformatics_35_24_5163_s5.doc]

Supplementary Materials

**Supplementary Table S1-10**

Supplementary Table S1-9 can be downloaded at http://www.bioopenwiki.com/AIVAR/data/Supplementary_Table_S1-9.zip

| **Train set** | **Pos/Neg ratio** | **Accuracy** | **Sensitivity** | **Specificity** | **PPV** | **NPV** |
| --- | --- | --- | --- | --- | --- | --- |
| Clin23star_0.990  Clin23star_0.995 | 15599/33628 | 78.30%  81.09% | 77.80%  68.37% | 78.67%  84.12% | 46.12%  50.53% | 93.51%  91.81% |
| Clin23-BRCA1_0.500  Clin23-BRCA1_0.805 | 2316/1154 | 82.81%  84.16% | 74.76%  63.90% | 84.72%  88.97% | 53.73%  57.89% | 93.40%  91.22% |

**Supplementary Table S10.** Performance statistics of AIVAR (trained by Clin23star full set or its BRCA1-only subset) on SGE_BRCA1 test set. Optimized cutoff values for each model is specified (e.g. cutoff value 0.99 and 0.995 for Clin23star full set model). Pos/Neg ratio: the number of P/LP variants versus B/LB variants in the data set. The pos/neg ratio of SGE_BRCA1 is 626/2638.

**Constructions of data sets**

***Clinvar data sets.*** Variants (408,690 in total) were obtained from Clinvar version 2018-09-30. We identified 207,796 non-conflicting, non-VUS variants (Clin_total, Supplementary Table S5). Among them, 9,259 variants were expert reviewed (Clin3stars, Supplementary Table S1); 39,968 variants were multiple submitted (Clin2stars, Supplementary Table S2); 34,032 variants were submitted by Clinvar’s top4 submitters Illumina, Invitae, GeneDx, Ambry Genetics (4labs); the union of these sets made up Clin23stars (Supplementary Table S3) and Clin23stars+4labs (Supplementary Table S4).

***TopGeneDB set.*** Saliva or blood samples were collected from over 5,000 unselected Chinese individuals and were sent to TopGene Clinical Diagnostic Laboratory (Zhongshan, China) for multi-gene hereditary cancer panel sequencing using a capture-based method. All individuals were informed of intended research usage and written consent was collected. Briefly, genomic DNA was extracted from each sample using Mag-bind blood and tissue DNA HDQ 96 kit (Omega Bioservices, Norcross, GA, USA) according to the manufacturer's instructions. DNA quality was checked with Nanodrop (Thermo Fisher Scientific, Waltham, MA, USA). DNA quantification was performed with Qubit fluorometer 3.0 (Thermo Fisher Scientific, Waltham, MA, USA). Target sequences were captured from the extracted DNA using the custom panel (TopGene, China). PCR products were subjected to quality check with LabChip GX Touch24 (PerkinElmer). Pair-end sequencing was performed according to manufacturer’s protocols (Illumina, San Diego, CA, USA) using the NextSeq CN500 platform. The average depth of each sample was at least 300X and the read length was 2x150bp. For each sample, reads generated from sequencing were subjected to reads processing and variant calling. The identified variants were annotated and manually verified. The prioritized variants were then interpreted and classified by human experts (twice per variant) according to the ACMG-AMP Guidelines (2015). See Supplementary Table S6 for the full content of TopGeneDB.

***Lincoln_BRCA1/2 set.*** Variants (5,124 in total) were obtained from the Lincoln et al. (2017) paper. Among them, we identified 2,567 non-VUS, non-conflicting variants and compiled into the Lincoln_BRCA1/2 set (Supplementary Table S7).

***SGE_BRCA1 set.*** Variants (3,893 in total) were obtained from the Findlay et al. (2018) paper. Filters were applied to remove variants that were functionally classified as “INT” (intermediate), which were considered “VUS-like” phenotype; variants that were overlapping with Clinvar data sets were also removed to ensure mutual exclusiveness during training and validation. The resulted 3,264 variants were compiled into the SGE_BRCA1 set (Supplementary Table S8).
